# Supplementary material for: Silencing of NLRP3 Sensitizes Chemoresistant Ovarian Cancer Cells to Cisplatin
Source: Hindawi journal article supplement (doi:10.1155/2023/7700673), 2023-06-02
Supplement: f1 [file 7700673.f1.pdf]

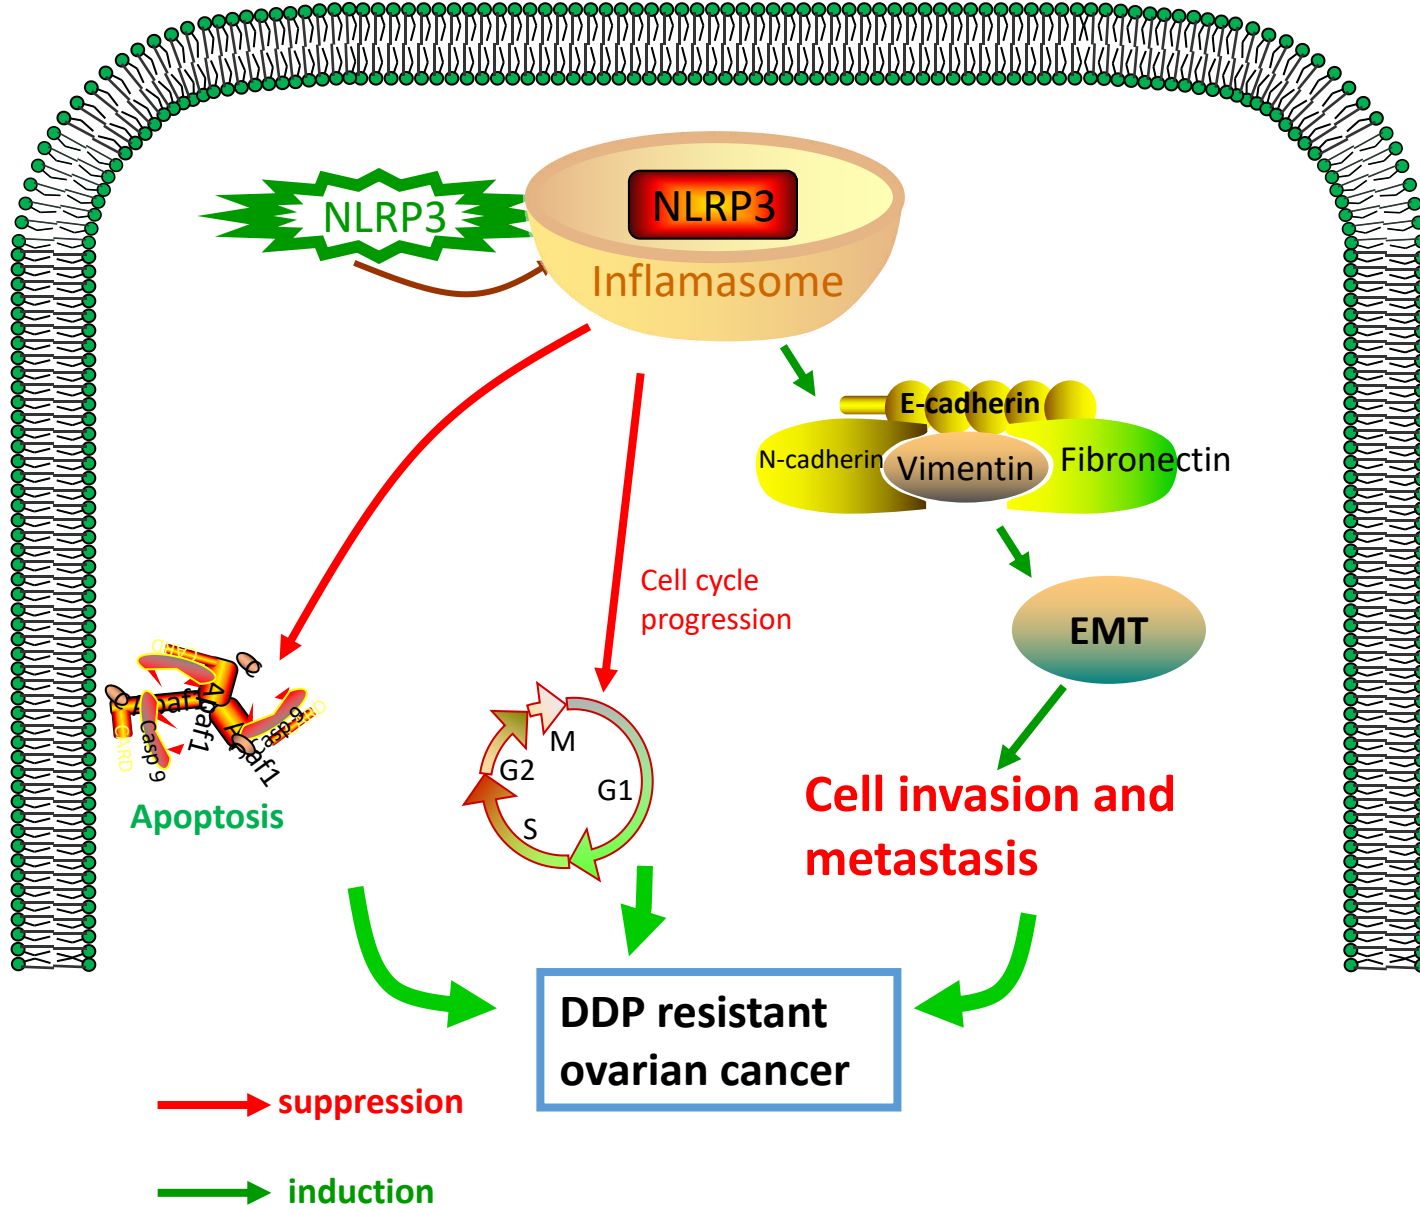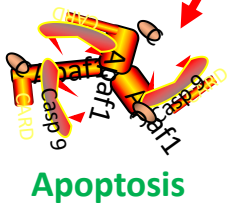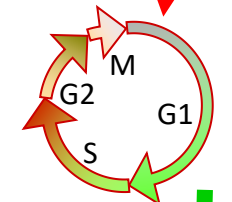

**DDP resistant ovarian cancer**

**suppression**

**induction**
